# Supplementary material for: Coat Color Roan Shows Association with KIT Variants and No Evidence of Lethality in Icelandic Horses
Source: MDPI journal article supplement (doi:10.3390/genes11060680), 2020-06-22
Supplement: s1 [file s1]

**Table S1.** Primer sequences for amplification of *KIT* exons

| Target <i>KIT</i>    | Primer        | Sequence                       | Product length | Annealing temperature |
|----------------------|---------------|--------------------------------|----------------|-----------------------|
| Exon 1               | KIT_Ex1_F     | 5'-CAACACAGGGGAGGAGATGAAGG-3'  | 1090           | 63°C                  |
|                      | KIT_Ex1_R     | 5'-AAAAGCCTCTCCAACCTTGCCCT-3'  |                |                       |
| Exon 2               | KIT_Ex2_F     | 5'-TGCATACCAAGTGTGACCCTCAG-3'  | 709            | 62°C                  |
|                      | KIT_Ex2_R     | 5'-AGTATCAGAGCCTTGACAGACCTG-3' |                |                       |
| Exon 3               | KIT_Ex3_F     | 5'-AGCAGCCATTTGAGTCACTAGGG-3'  | 575            | 62°C                  |
|                      | KIT_Ex3_R     | 5'-GTGGGGCTGGGACTGTGAAATAA-3'  |                |                       |
| Exon 4               | KIT_Ex4_F     | 5'-GTCCAGGAGCATTAGAACCTCACA-3' | 525            | 62°C                  |
|                      | KIT_Ex4_R     | 5'-GTTCCACCTCACAGACACACCAG-3'  |                |                       |
| Exon 5               | KIT_Ex5_F     | 5'-TGGGTGAGAACAGTGGGATGAGT-3'  | 959            | 63°C                  |
|                      | KIT_Ex5_R     | 5'-TTTGTGTTTGGTGGGGAGGGG-3'    |                |                       |
| Exon 6               | KIT_Ex6_F     | 5'-CCTGGGTCTGGGTATAGGCTAACT-3' | 664            | 63°C                  |
|                      | KIT_Ex6_R     | 5'-CCCCAACTCCCTTCCATAGCAG-3'   |                |                       |
| Exon 7               | KIT_Ex7_F     | 5'-CAAAATTGACCTTGCTGCTCGGG-3'  | 775            | 63°C                  |
|                      | KIT_Ex7_R     | 5'-CGTCTACAAGGTCACGTGGTCAG-3'  |                |                       |
| Exon 8               | KIT_Ex8_F     | 5'-GTTTGACCCCTCACATCCACCTC-3'  | 649            | 63°C                  |
|                      | KIT_Ex8_R     | 5'-TACAGCTGCATTTCCACACACA-3'   |                |                       |
| Exon 9               | KIT_Ex9_F     | 5'-GCTTTCCTCCTGCATGCTTTTCC-3'  | 798            | 62°C                  |
|                      | KIT_Ex9_R     | 5'-TGACAGTAGAACGCAATGCAGGT-3'  |                |                       |
| Exon 10              | KIT_Ex10_F    | 5'-GGGTTTCCGTGATTGTGGTGAAG-3'  | 646            | 62°C                  |
|                      | KIT_Ex10_R    | 5'-GTAAGTGGCAGTGATGGTGAGGG-3'  |                |                       |
| Exon 11              | KIT_Ex11_F    | 5'-ATCCATCCCCCACTCTGTTCAC-3'   | 693            | 62°C                  |
|                      | KIT_Ex11_R    | 5'-TGAGCATCTTCACAGCAACAGTCA-3' |                |                       |
| Exon 12 +<br>Exon 13 | KIT_Ex12/13_F | 5'-GGAACCCAGTAGCTTCCTTTGT-3'   | 712            | 62°C                  |
|                      | KIT_Ex12/13_R | 5'-ATCCCACCCACGATGAGAAAAC-3'   |                |                       |
| Exon 14              | KIT_Ex14_F    | 5'-CACCTGGCCCCTAATCTCTCAGA-3'  | 706            | 63°C                  |
|                      | KIT_Ex14_R    | 5'-GAATGACACCAAGAGCGGAACCA-3'  |                |                       |
| Exon 15              | KIT_Ex15_F    | 5'-CCATCTAGCTCCTGGGGATTGGA-3'  | 710            | 63°C                  |
|                      | KIT_Ex15_R    | 5'-TAACGGATGTGAACTTGCAGGCA-3'  |                |                       |
| Exon 16              | KIT_Ex16_F    | 5'-TTCAACACCCACCTTTCCTCACA-3'  | 615            | 62°C                  |
|                      | KIT_Ex16_R    | 5'-GCACTGCAACTACATGAGGTACCT-3' |                |                       |
| Exon 17              | KIT_Ex17_F    | 5'-CTGCCCTTAAGTGTGTTGGTGA-3'   | 868            | 63°C                  |
|                      | KIT_Ex17_R    | 5'-TTCTGTTTCTTTCACGTGCCCCA-3'  |                |                       |
| Exon 18              | KIT_Ex18_F    | 5'-GGGTGTTTTCTAAAGCTGCCAA-3'   | 849            | 62°C                  |
|                      | KIT_Ex18_R    | 5'-AGAAGGAAACACATCTTGGCCCT-3'  |                |                       |
| Exon 19              | KIT_Ex19_F    | 5'-CCTGTGAAATGGATGGCACCTGA-3'  | 740            | 63°C                  |
|                      | KIT_Ex19_R    | 5'-ACGATCTGCTTGAATGTTGCCT-3'   |                |                       |
| Exon 20              | KIT_Ex20_F    | 5'-CACCTGCTGAAATGTAAGGGCCA-3'  | 689            | 63°C                  |
|                      | KIT_Ex20_R    | 5'-TCCCTCCTCATCCAAATCCTT-3'    |                |                       |
| Exon 21              | KIT_Ex21_F    | 5'-TTGGGTTTTGGCTGTGGTCTTGT-3'  | 571            | 63°C                  |
|                      | KIT_Ex21_R    | 5'-TTGGAAAGGACTCGGGGTGTCTA-3'  |                |                       |
